# Supplementary material for: The interplay between dietary fatty acids and gut microbiota influences host metabolism and hepatic steatosis
Source: PubMed Central journal article supplement (PMC10474162; doi:10.1038/s41467-023-41074-3), 2023-09-01
Supplement: 41467_2023_41074_MOESM1_ESM.pdf [file 41467_2023_41074_MOESM1_ESM.pdf]

## Supplementary Information

### The interplay between dietary fatty acids and gut microbiota influences host metabolism and hepatic steatosis

Schoeler et al.

|                         |    |
|-------------------------|----|
| Supplementary Figure 1  | 1  |
| Supplementary Figure 2  | 2  |
| Supplementary Figure 3  | 3  |
| Supplementary Figure 4  | 4  |
| Supplementary Figure 5  | 5  |
| Supplementary Figure 6  | 6  |
| Supplementary Figure 7  | 7  |
| Supplementary Figure 8  | 8  |
| Supplementary Figure 9  | 9  |
| Supplementary Figure 10 | 10 |
| Supplementary Table 1   | 11 |
| Supplementary Table 2   | 12 |
| Supplementary Table 3   | 13 |
| Supplementary Table 4   | 14 |
| Supplementary Table 5   | 15 |

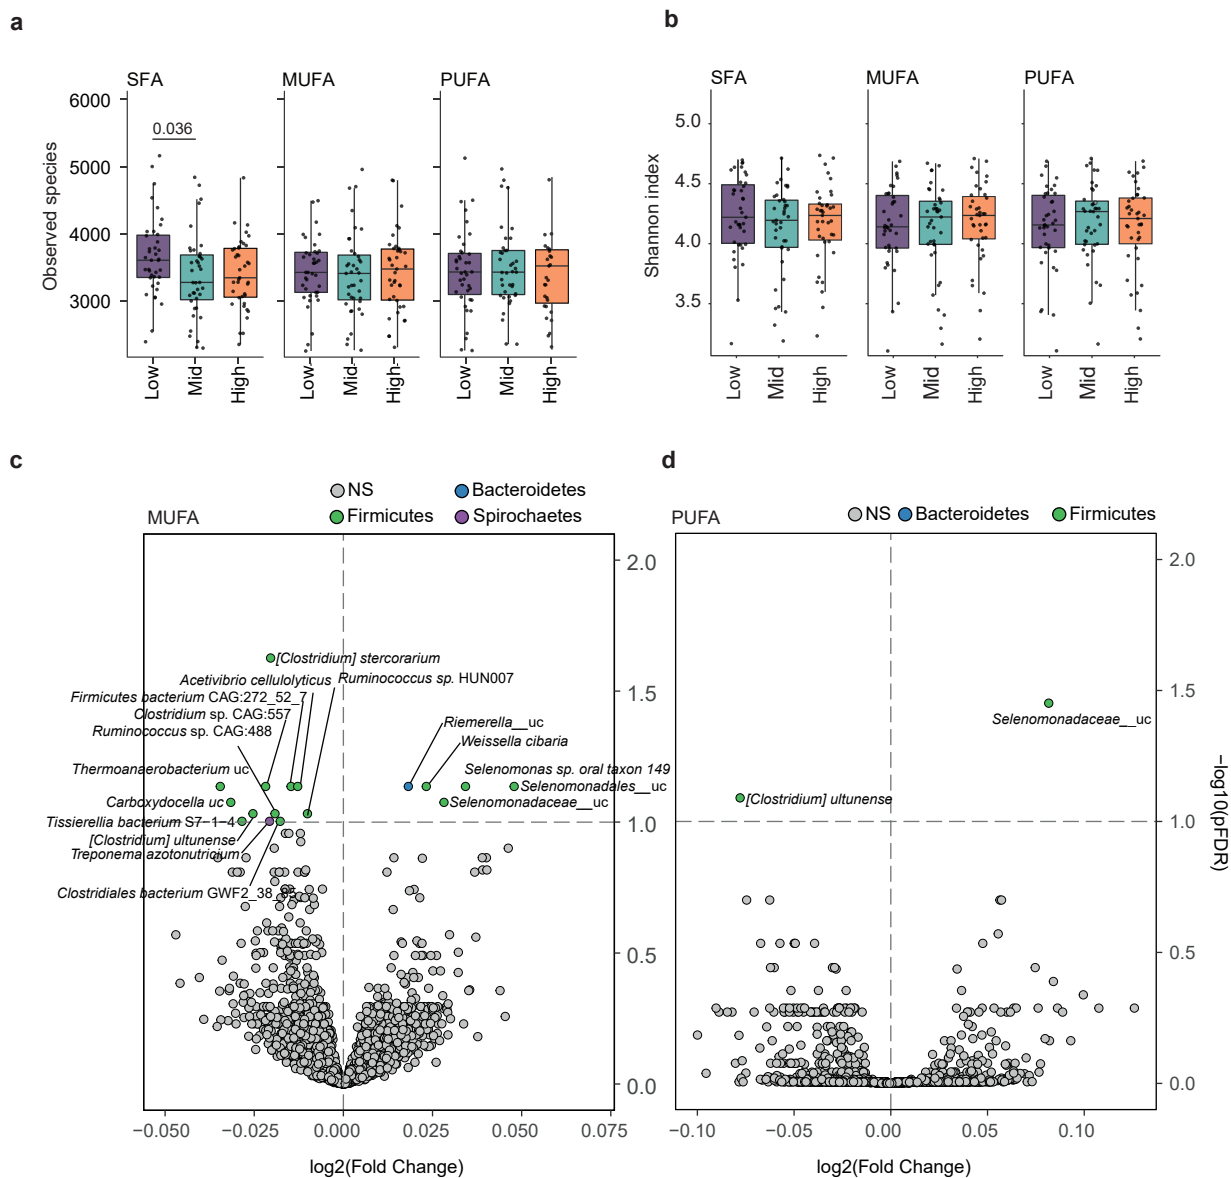

**Supplementary Figure 1. The effect of dietary fatty acid saturation level on human fecal microbiota composition.** Related to Figure 1. Subjects are from the IRONMET cohort. **a** Number of observed species and the **b** Shannon index in feces of subjects divided into tertiles based on their SFA, MUFA or PUFA consumption. There were no differences in the library size among tertiles. Volcano plots of differential bacterial (pFDR < 0.05) associated with the amount of **c** MUFA intake and **d** PUFA intake, after fitting a robust linear regression model to the clr-transformed data controlling for age, sex, BMI and fiber intake. Fold change associated with a unit change in fatty acids and FDR-adjusted values (pFDR) are plotted for each taxon. Significant taxa are colored according to phylum as shown.

$n = 117$ . Significant p-values as determined by two-sided Wilcoxon rank-sum test are displayed in the figure. For box plots in panel a and b: the middle line is the median, the lower and upper hinges are the first and third quartiles, the whiskers extend from the hinge to the largest and smallest value no further than  $1.5 \times$  the inter-quartile range (IQR). SFA = saturated fatty acids; MUFA = mono-unsaturated fatty acids; PUFA = poly-unsaturated fatty acids. Source data are provided as a Source Data file.

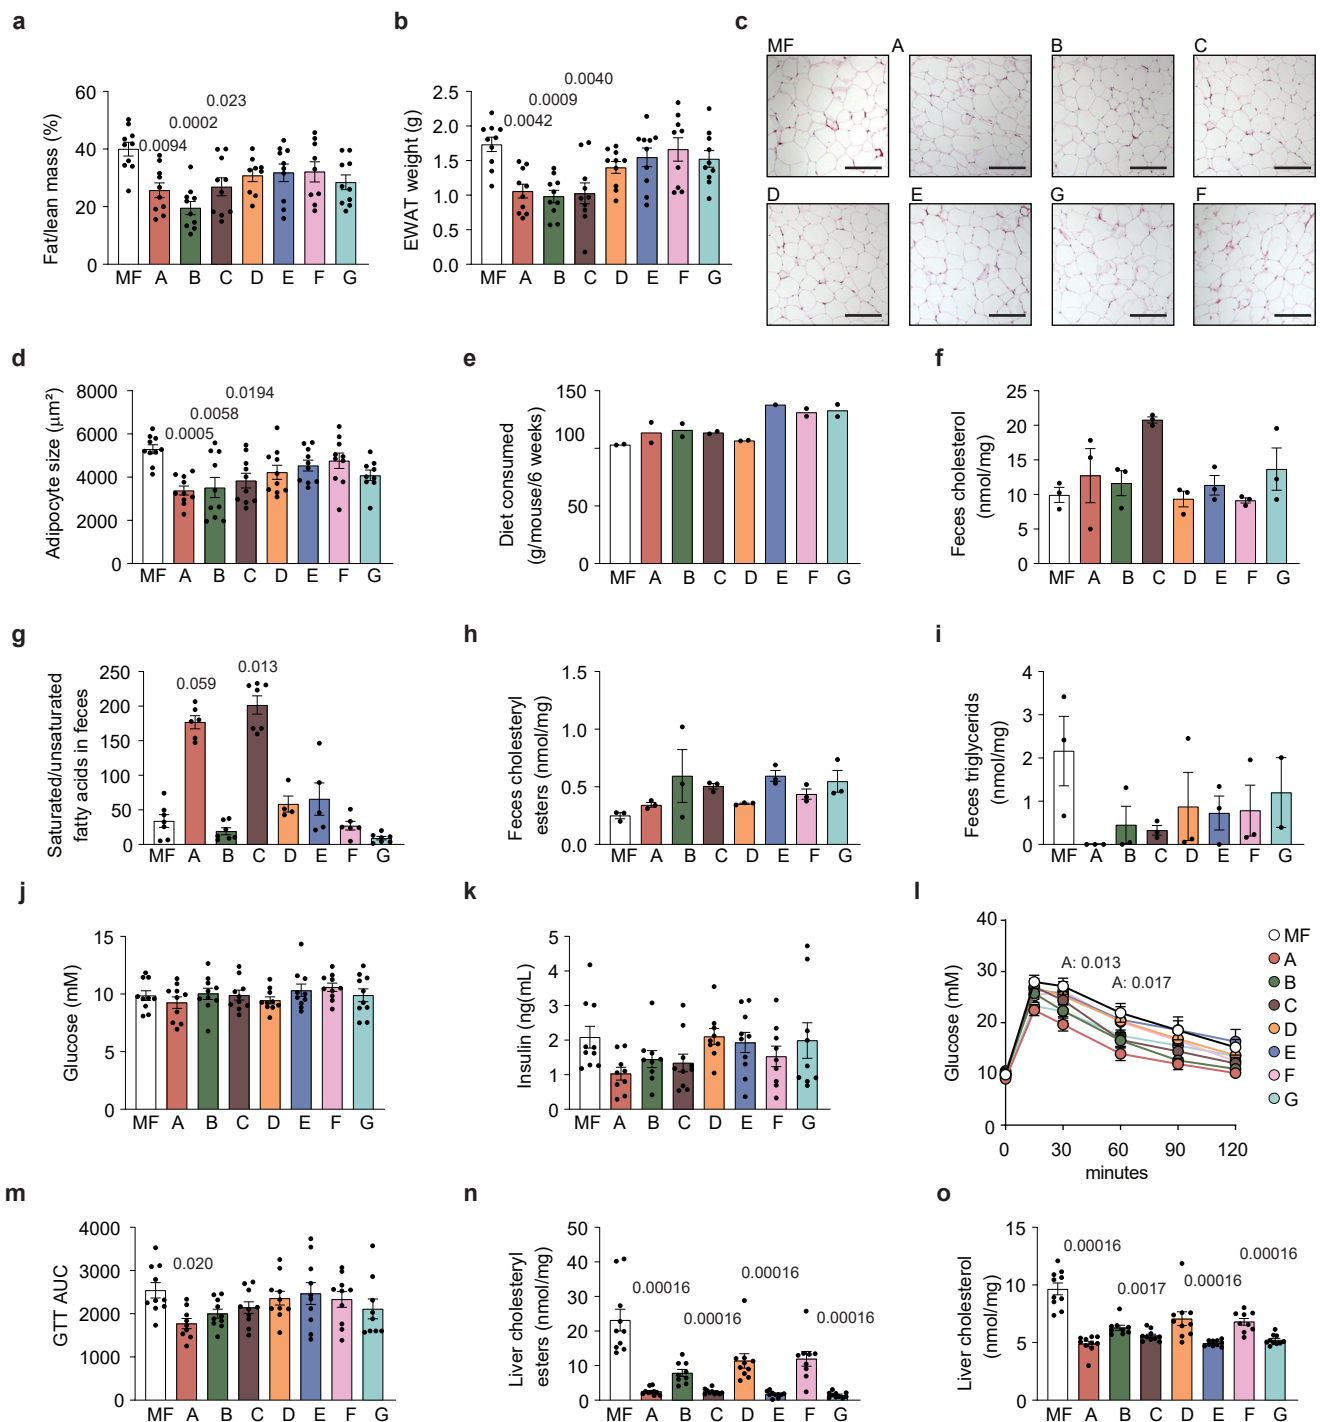

**Supplementary Figure 2. Metabolic profile, diet consumption and lipid levels in liver and feces in mice fed high-fat diets.** Related to Figure 2. Mice were fed high-fat diets for 9 weeks. **a** Fat/lean mass measured by magnetic resonance imaging during week 9. **b** EWAT weight, **c** hematoxylin and eosin staining of representative WAT tissue (scale bar = 100  $\mu$ m) and **d** average adipocyte size. **e** Cage-wise measurement of accumulated diet consumption over six weeks (last weeks excluded due to metabolic testing during this period). **f** Fecal cholesterol, **g** ratio between saturated and unsaturated fecal free fatty acids, **h** fecal cholesteryl esters and **i** fecal triglycerides. Fasting **j** glucose and **k** insulin levels. **l-m** Glucose tolerance, **n** liver cholesteryl esters, **o** liver cholesterol.

Panel **a**:  $n = 10$  except for D and F where  $n = 9$ ; Panel **b**, **d** and **o**:  $n = 10$  except for F where  $n = 9$ ; panel **e**:  $n = 2$ ; panel **f** and **h**:  $n = 3$ ; panel **i**:  $n = 3$  except for G where  $n = 2$ ; panel **g**:  $n = 7$  (MF, B, C, G), 6 (A, F), 5 (E), 4 (D); panel **j**:  $n = 10$ ; panel **k**:  $n = 10$  except for A, B, F and G where  $n = 9$ ; panel **l-m**:  $n = 10$  except for A and G where  $n = 9$ . Significant p-values vs MF diet as determined by two-sided Kruskal-Wallis test are displayed in the figure. Data are presented as mean  $\pm$  SEM. GTT = glucose tolerance test; EWAT = epididymal white adipose tissue. Source data are provided as a Source Data file.

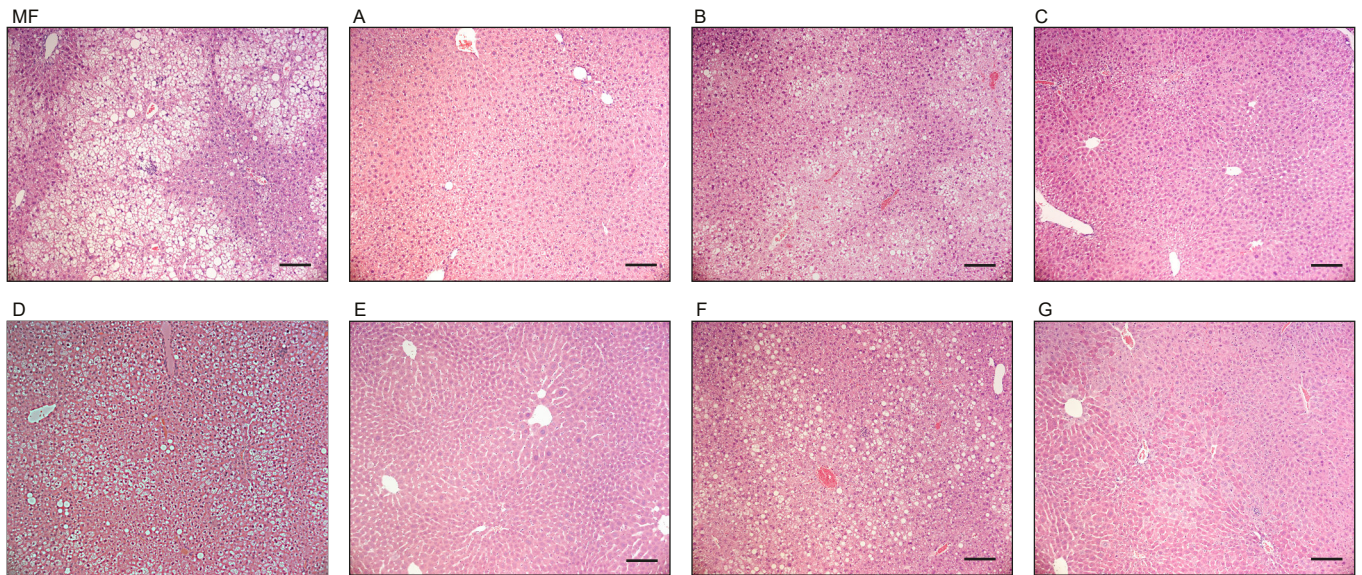

**Supplementary Figure 3. Hematoxylin and eosin staining of liver tissue in mice fed high-fat diets.** Related to Figure 2. Eight groups of mice were fed high-fat diets with different lipid compositions (MF, A-G) for 9 weeks (scale bar = 100  $\mu$ m).

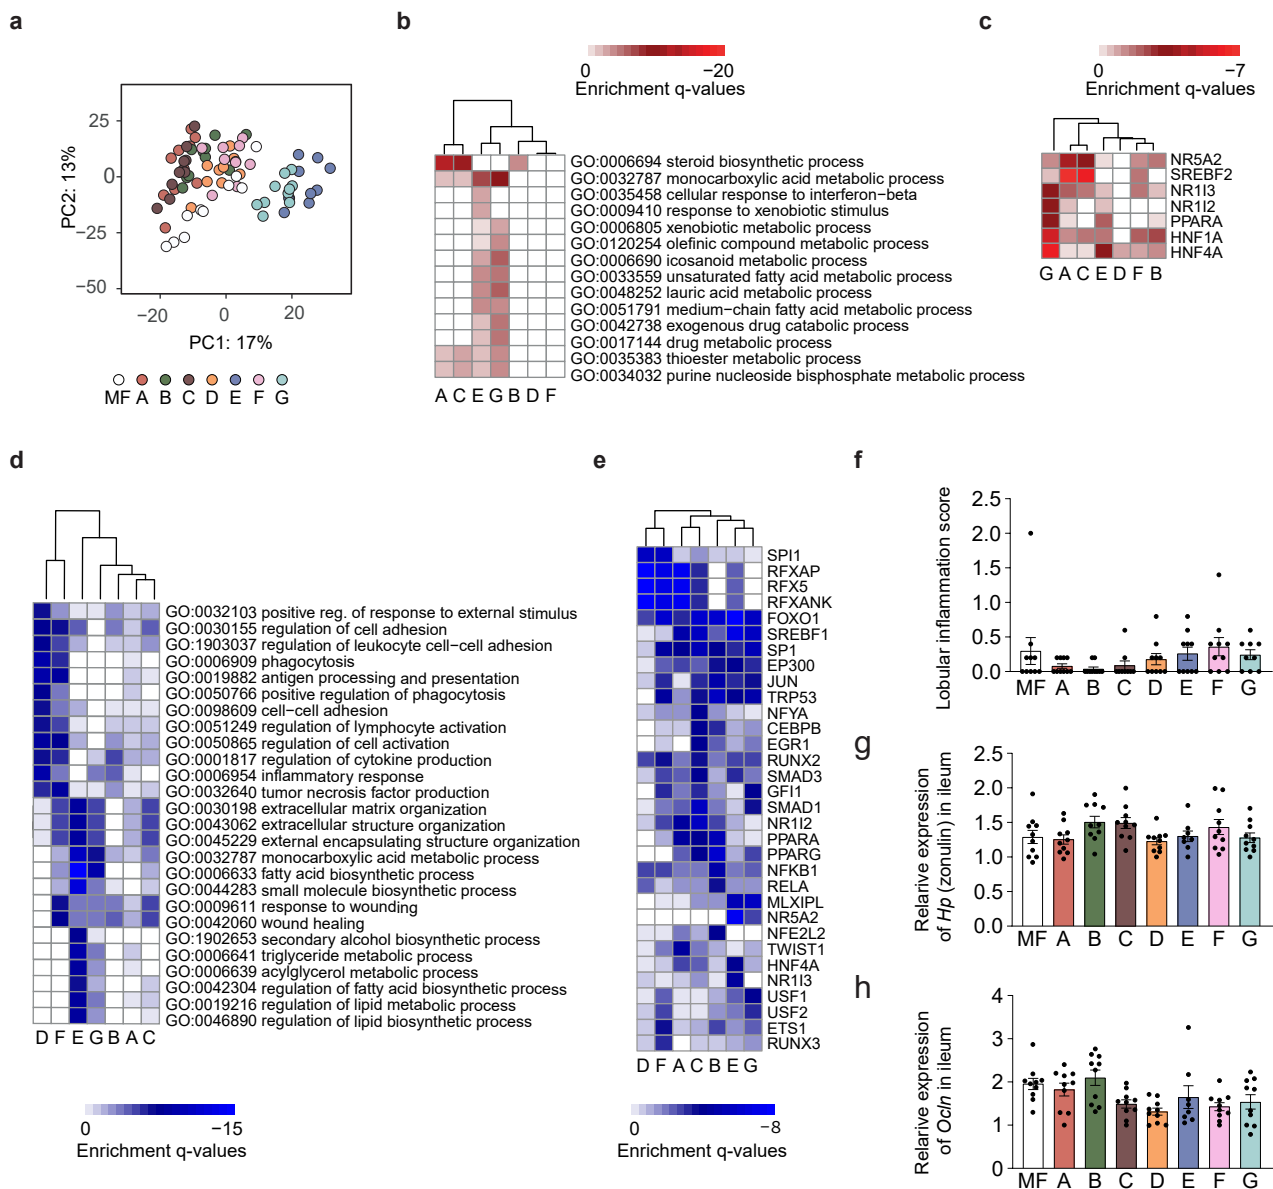

**Supplementary Figure 4. Liver phenotype of mice fed high-fat diets.** Related to Figure 2. **a** Principal component analysis (PCA) performed on whole hepatic transcriptome. **b** Gene categories enriched in genes upregulated compared to mice fed the MF diet. **c** Transcription factors predicted as up-stream regulators of genes upregulated compared to mice fed MF diet. **d** Gene categories enriched in genes downregulated compared to mice fed MF diet. **e** Transcription factors predicted as up-stream regulators of genes downregulated compared to mice fed the MF diet. **f** Lobular inflammation score. Relative expression of **g** zonulin (*Hp*) and **h** occludin (*Ocln*) in ileum determined by qPCR.

Panel **a-e**:  $n = 10$  except for G where  $n = 9$ ; panel **f**:  $n = 10$  except for G where  $n = 9$ ; **g-h**:  $n = 10$  except for E where  $n = 8$ . Data are presented as mean  $\pm$  SEM.

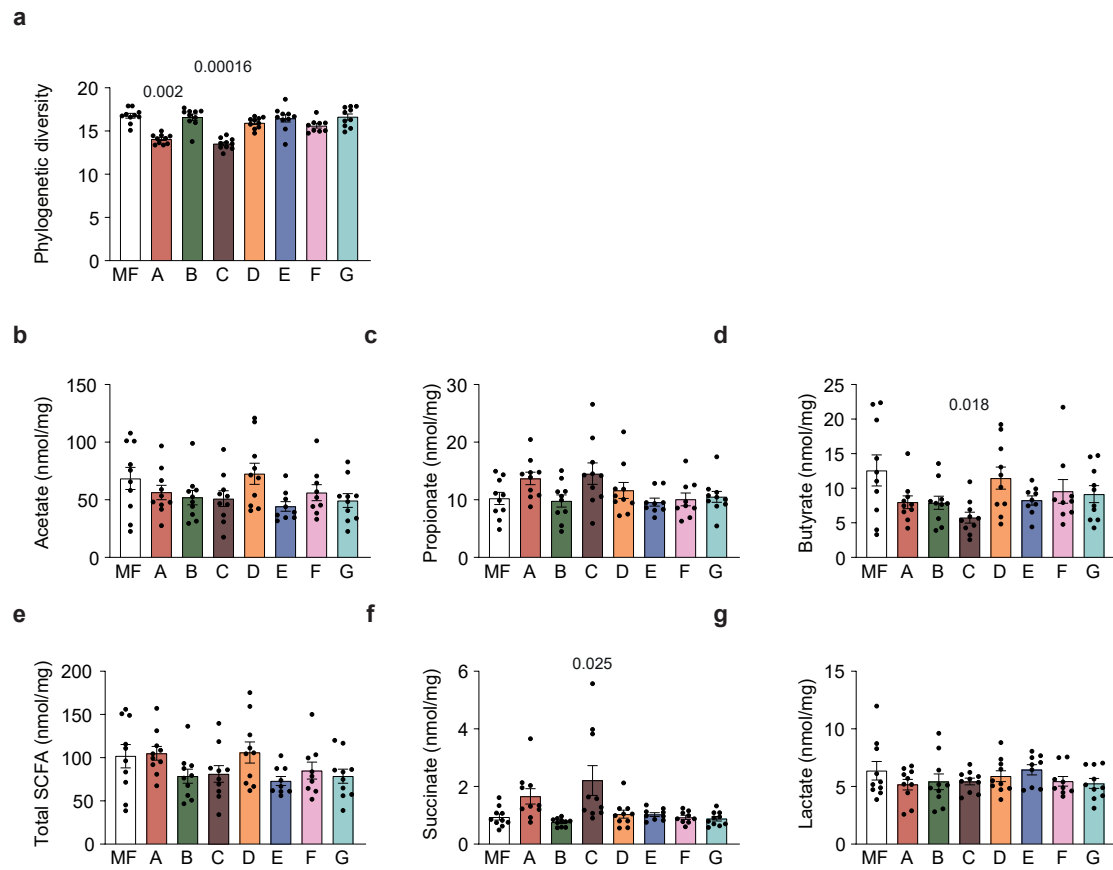

**Supplementary Figure 5. Microbiota diversity and cecum levels of SCFA, succinate and lactate in mice fed high-fat diets.** Related to Figure 3. **a** Cecum microbiota phylogenetic diversity and concentrations of **b** acetate, **c** propionate, **d** butyrate, **e** total SCFA, **f** succinate and **g** lactate in cecum of mice fed high-fat diets for 9 weeks.

Panel **a**:  $n = 10$  except for F where  $n = 9$ ; panel **b-g**:  $n = 10$  except for E and F where  $n = 9$ . Significant p-values vs MF diet as determined by two-sided Kruskal-Wallis test are displayed in the figure. Data are presented as mean  $\pm$  SEM. SCFA = short-chain fatty acids. Source data are provided as a Source Data file.

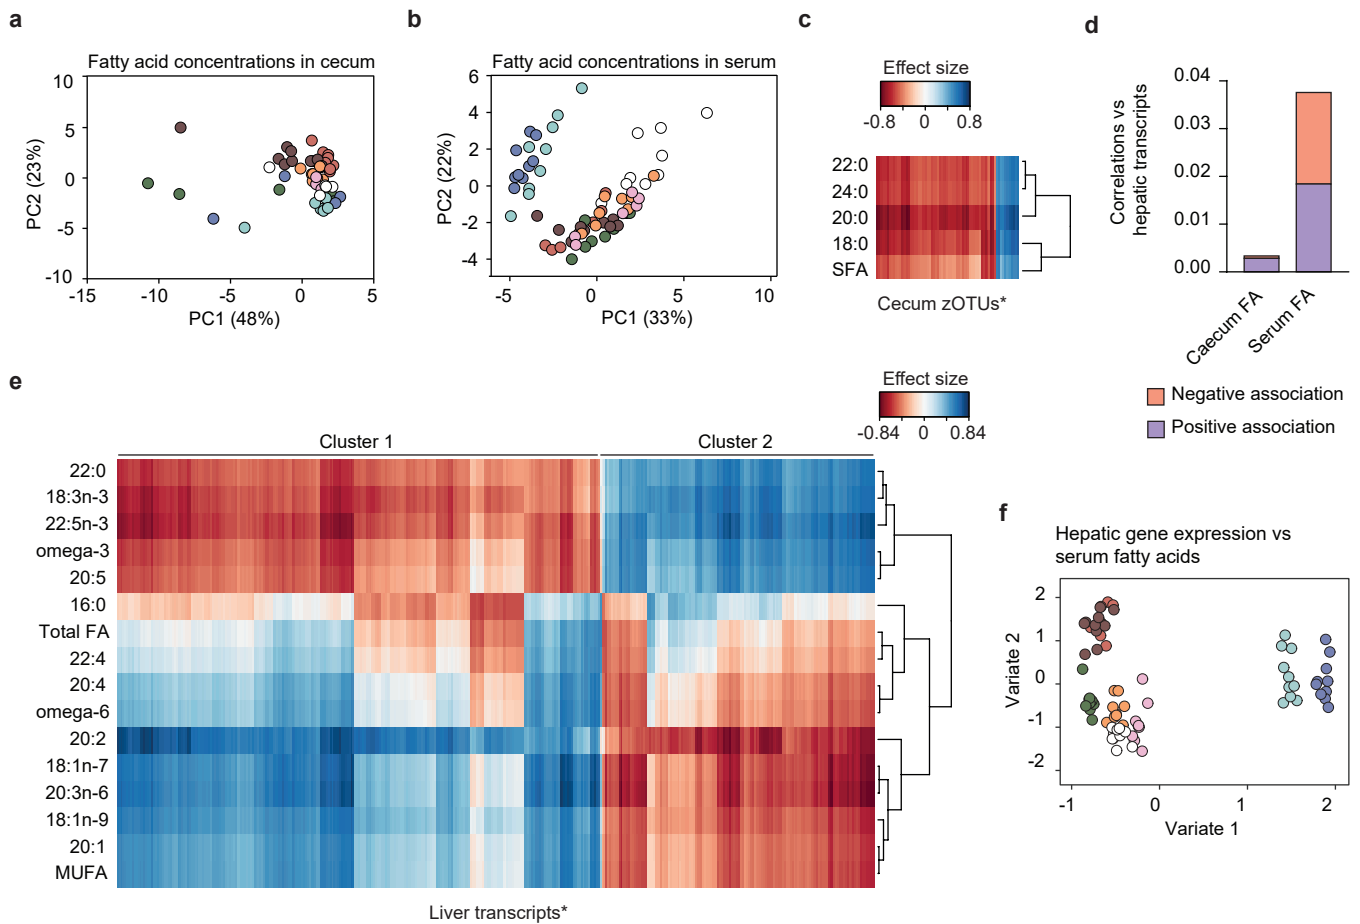

**Supplementary Figure 6. Fatty acid composition and correlations between fatty acids, cecum bacteria and hepatic gene expression determined by rCCA analysis.** Related to Figure 5. Principal component analysis (PCA) performed on fatty acid concentrations in **a** cecum and **b** serum. **c** Correlations between cecum fatty acids and cecum bacteria (\*See bacterial taxa and correlations in Table S4). **d** Density of the correlation network between hepatic gene expression levels, as determined by microarray analysis, and cecal or serum fatty acids determined by regularized canonical correlation analysis (rCCA). **e** Correlations between serum fatty acid levels and liver transcripts (\*See Table S6 for GO enrichment of correlated genes). **f** Cluster plot based on correlations between serum fatty acids and hepatic gene expression levels determined by rCCA. Cecum samples:  $n = 5$  (MF), 10 (A), 6 (B), 9 (C), 7 (D), 4 (E), 3 (F), 7 (G); serum samples:  $n = 9$  (MF), 7 (A), 8 (B), 9 (C), 8 (D), 9 (E), 6 (F), 9 (G). Source data are provided as a Source Data file.

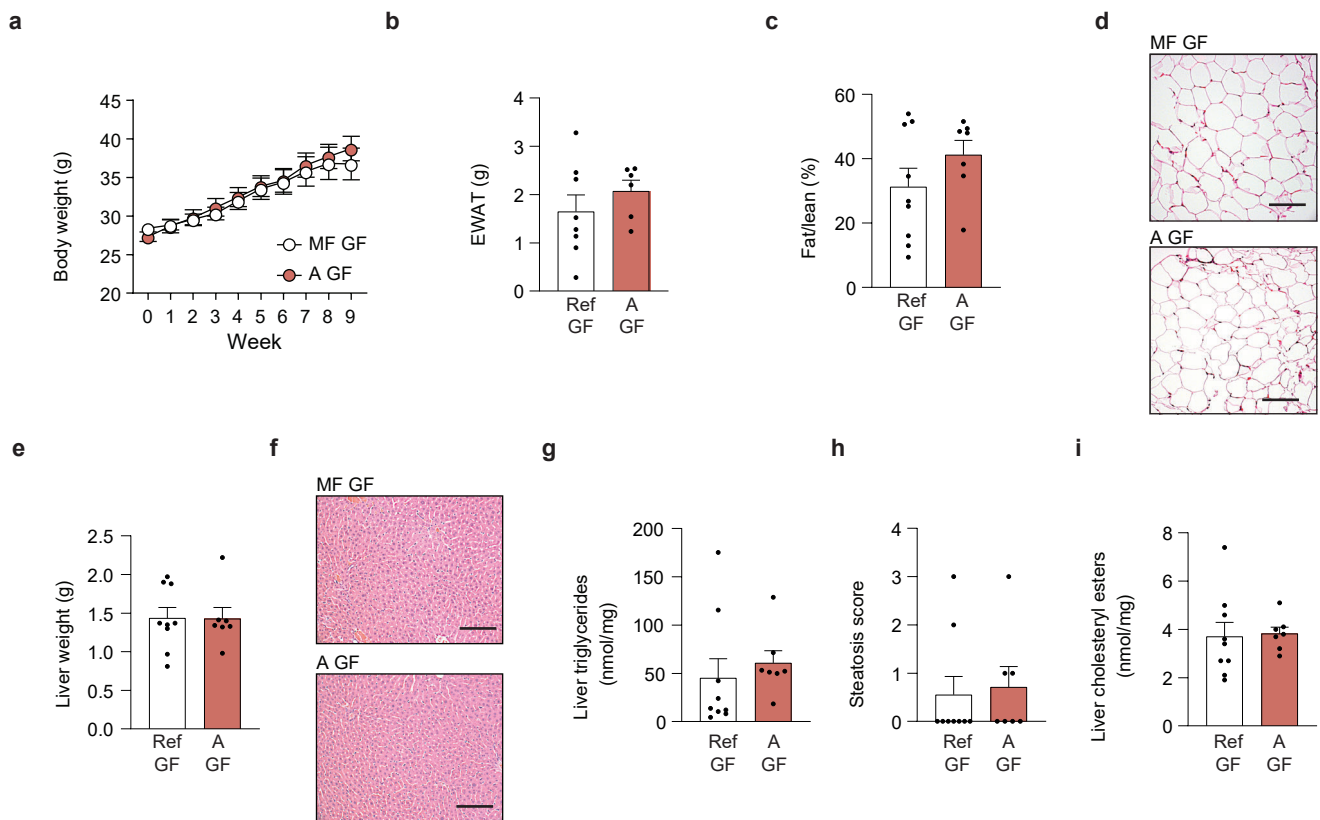

**Supplementary Figure 7. Metabolic phenotype of germ-free mice fed MF diet or diet A.** Germ-free (GF) mice were fed either MF diet or diet A for 9 weeks. **a** Body weight, **b** EWAT weight, **c** fat/lean mass measured by magnetic resonance imaging at week 9, **d** hematoxylin and eosin staining of representative WAT tissue (scale bar = 100 μm), **e** liver weight, **f** hematoxylin and eosin staining of liver tissue (scale bar = 100 μm), **g** steatosis score, **h** liver triglycerides and **i** liver cholesteryl esters.

$n = 9$  (MF) and 7 (A). Significance is determined by two-sided Mann–Whitney U test. Data are presented as mean  $\pm$  SEM. EWAT = epididymal white adipose tissue. Source data are provided as a Source Data file.



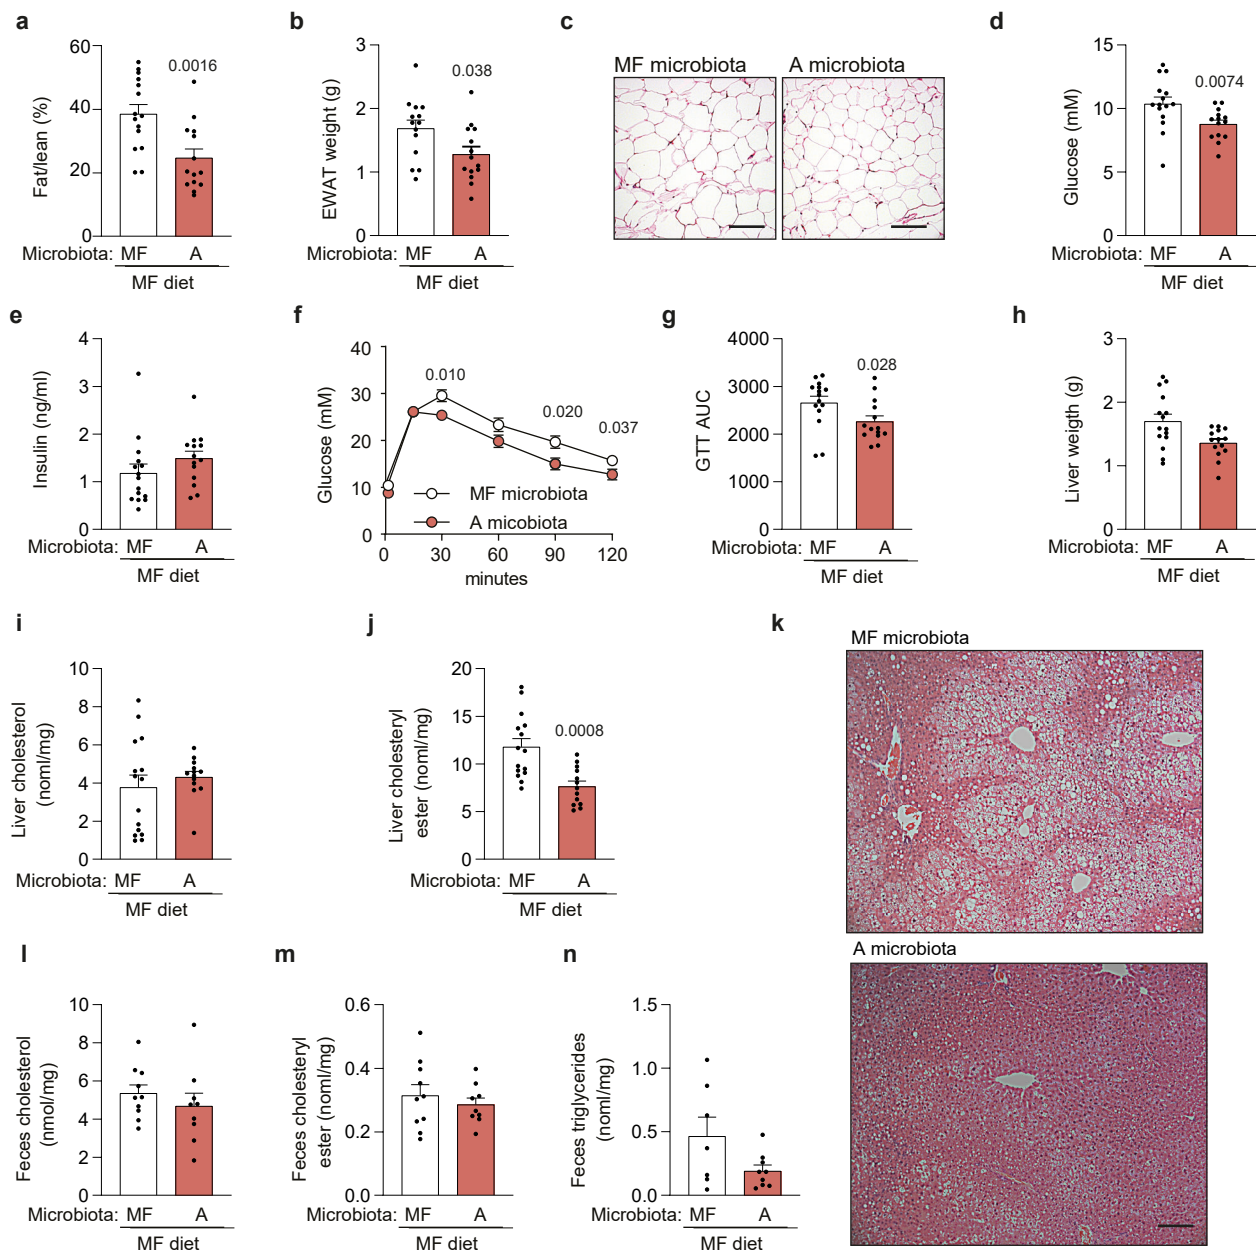

**Supplementary Figure 8. Metabolic phenotype, of mice colonized with cecal microbiota from mice fed MF diet or diet A, then subsequently fed MF diet.** Related to Figure 6. All mice were fed MF diet for 9 weeks after first microbiota transfer. **a** Fat/lean mass measured by magnetic resonance imaging during week 9 of high-fat diet, **b** EWAT weight, **c** hematoxylin and eosin staining of representative WAT tissue (scale bar = 100  $\mu$ m), fasting **d** glucose and **e** insulin levels, **f-g** glucose tolerance, **h** liver weight, **i** liver cholesterol, **j** liver cholesteryl esters, **k** hematoxylin and eosin staining of liver tissue (scale bar = 100  $\mu$ m), **l** fecal cholesteryl esters, **m** fecal triglycerides and **n** fecal free fatty acids.

Panel **a-h**:  $n = 15$  (MF microbiota), 14 (A microbiota) except panel **b** where  $n = 14$  (MF microbiota); panel **i-j**:  $n = 15$  (MF microbiota), 13 (A microbiota); panel **l-m**: 10 (MF microbiota), 9 (A microbiota); panel **n**:  $n = 7$  (MF microbiota), 9 (A microbiota). Significant  $p$ -values determined by two-sided Mann–Whitney U test are displayed in the figure. Data are presented as mean  $\pm$  SEM. GTT = glucose tolerance test; EWAT = epididymal white adipose tissue. Source data are provided as a Source Data file.

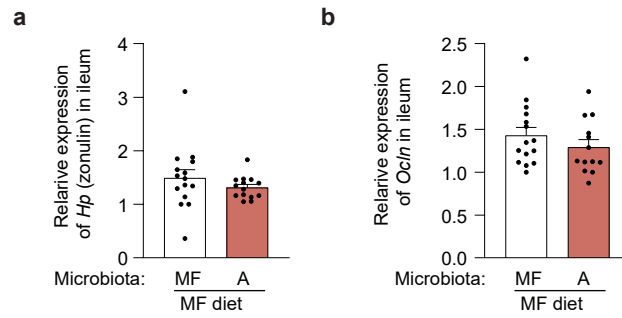

**Supplementary Figure 9. Expression of genes encoding tight junction proteins in mice colonized with cecal microbiota from mice fed either MF diet or diet A, then subsequently fed MF diet.** Relative expression of **a** zonulin (*Hp*) ( $n = 15$  (MF microbiota) and 13 (A microbiota)) and **b** occludin (*Ocln*) determined by qPCR in ileum.

$n = 15$  (MF microbiota) and 14 (A microbiota). Data are presented as mean  $\pm$  SEM. Source data are provided as a Source Data file.

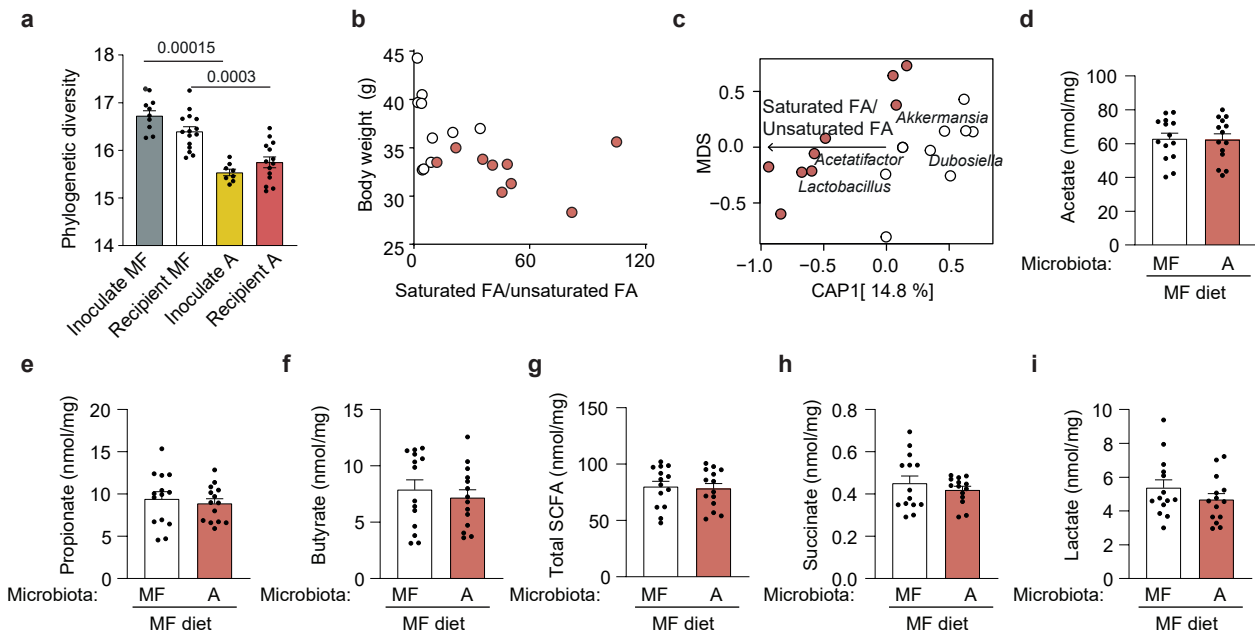

**Supplementary Figure 10. Cecum microbiota phylogenetic diversity and metabolites in mice colonized with cecal microbiota from mice fed either MF diet or diet A, then subsequently fed MF diet.** Related to Figure 7. **a** Cecum microbiota phylogenetic diversity. **b** Correlation between body weight and ratio between saturated and unsaturated fatty acids. **c** Distance-based redundancy analysis of composition using the ratio of saturated and unsaturated fatty acids in feces. The statistical model constrains 14,8 % of the compositional variation ( $p < 0.01$ ). Cecum levels of **d** acetate, **e** propionate, **f** butyrate, **g** total SCFA, **h** succinate and **i** lactate.

Panel **a**:  $n = 9$  (MF microbiota inoculate), 15 (MF microbiota recipients), 8 (A microbiota inoculate), 14 (A microbiota recipients); panel **b**:  $n = 10$  (MF microbiota) and 9 (A microbiota); panel **d-h**:  $n = 14$ . Significant  $p$ -values determined by two-sided Mann–Whitney U test are displayed in the figure. Data are presented as mean  $\pm$  SEM. SCFA = short-chain fatty acids. Source data are provided as a Source Data file.

**Supplementary Table 1. GO enrichment analysis of genes contributing to Variate 1 and 2 in sPLS plot. Related to Figure 2j.**

| Pathway                                                | GO      | FDR      | Fold Enrichment |
|--------------------------------------------------------|---------|----------|-----------------|
| <b>sPLS Variate 1</b>                                  |         |          |                 |
| Fatty acid biosynthetic process                        | 0006633 | 5.18E-05 | 24.65           |
| Monocarboxylic acid metabolic process                  | 0032787 | 9.93E-05 | 8.75            |
| Triglyceride metabolic process                         | 0006641 | 0.000142 | 27.63           |
| Anion transport                                        | 0006820 | 0.000834 | 7.45            |
| Small molecule biosynthetic process                    | 0044283 | 0.000834 | 7.54            |
| Positive regulation of fatty acid biosynthetic process | 0045723 | 0.000834 | 72.95           |
| <b>sPLS Variate 2</b>                                  |         |          |                 |
| Small molecule metabolic process                       | 0044281 | 2.16E-05 | 7.13            |
| Sterol biosynthetic process                            | 0016126 | 3.39E-05 | 85.3            |
| Organic hydroxyl-compound metabolic process            | 1901615 | 0.000338 | 13.1            |
| Secondary alcohol metabolic process                    | 1902652 | 0.000338 | 33.1            |
| Steroid biosynthetic process                           | 0006694 | 0.000442 | 28.7            |
| Small molecule biosynthetic process                    | 0044283 | 0.000522 | 10.7            |

**Supplementary Table 2. Cytokines in serum from *vena cava*.** Eight groups of mice (MF, A-G) were fed high fat diets with different lipid compositions for 9 weeks. n = 10 except for F where n is 9. \*p = 0.01 vs MF diet as determined by Kruskal-Wallis test. Data are presented as mean ± SEM. Source data are provided as a Source Data file.

|                                | <b>MF</b>    | <b>A</b>      | <b>B</b>     | <b>C</b>     | <b>D</b>      | <b>E</b>      | <b>F</b>    | <b>G</b>      |
|--------------------------------|--------------|---------------|--------------|--------------|---------------|---------------|-------------|---------------|
| <b>IFN-<math>\gamma</math></b> | 0,37 ± 0,087 | 0,28 ± 0,063  | 0,39 ± 0,046 | 0,44 ± 0,11  | 0,33 ± 0,067  | 0,77 ± 0,18   | 0,52 ± 0,12 | 0,87 ± 0,14*  |
| <b>IL10</b>                    | 9,8 ± 1,2    | 8,7 ± 0,83    | 7,5 ± 0,88   | 11 ± 2       | 6,2 ± 0,71    | 9,9 ± 1,1     | 9,1 ± 1     | 8,9 ± 1,2     |
| <b>IL12p70</b>                 | 17 ± 10      | 7,8 ± 2,8     | 5 ± 1,7      | 13 ± 8,7     | 10 ± 4,2      | 4 ± 2         | 52 ± 34     | 10 ± 2,9      |
| <b>IL13</b>                    | 0,15 ± 0,15  | 0 ± 0         | 0 ± 0        | 1,2 ± 0,77   | 0,22 ± 0,20   | 0,35 ± 0,29   | 1,2 ± 1,0   | 0,0 ± 0,0     |
| <b>IL-1<math>\beta</math></b>  | 1,4 ± 0,27   | 0,23 ± 0,1    | 2,3 ± 1,4    | 0,53 ± 0,34  | 0,45 ± 0,17   | 4,6 ± 3,2     | 0,43 ± 0,21 | 0,36 ± 0,13   |
| <b>IL5</b>                     | 4 ± 1,2      | 2 ± 0,3       | 2,8 ± 0,47   | 1,8 ± 0,21   | 2 ± 0,23      | 2,6 ± 0,19    | 2,7 ± 0,31  | 3,4 ± 0,8     |
| <b>KC</b>                      | 85 ± 10      | 88 ± 19       | 78 ± 7,4     | 73 ± 9       | 88 ± 13       | 94 ± 9,1      | 96 ± 10     | 79 ± 3,8      |
| <b>TNF<math>\alpha</math></b>  | 9,8 ± 0,66   | 7,5 ± 0,49    | 9 ± 0,49     | 8,2 ± 0,68   | 8,1 ± 1       | 10 ± 0,73     | 9,9 ± 0,51  | 9,8 ± 0,88    |
| <b>IL2</b>                     | 0,73 ± 0,14  | 0,89 ± 0,16   | 0,55 ± 0,11  | 0,87 ± 0,12  | 0,81 ± 0,1    | 0,79 ± 0,21   | 1,1 ± 0,35  | 0,77 ± 0,2    |
| <b>IL4</b>                     | 0,37 ± 0,24  | 0,089 ± 0,039 | 0,05 ± 0,021 | 0,1 ± 0,068* | 0,076 ± 0,029 | 0,024 ± 0,022 | 0,29 ± 0,22 | 0,096 ± 0,041 |

**Supplementary Table 3. Pairwise analysis of dietary groups (anosim, 9999 permutations) based on Bray-Curtis dissimilarity or UniFrac distance. Related to Figure 3a,b.**

| Test variables | Bray Curtis |         | Unweighted UniFrac |         |
|----------------|-------------|---------|--------------------|---------|
|                | R value     | P value | R value            | P value |
| MF vs A        | 0.73        | 0.0001  | 0.99               | 0.0001  |
| MF vs B        | 0.38        | 0.0016  | 0.36               | 0.0002  |
| MF vs C        | 0.87        | 0.0001  | 0.97               | 0.0001  |
| MF vs D        | 0.06        | 0.1151  | 0.24               | 0.0005  |
| MF vs E        | 0.17        | 0.0084  | 0.32               | 0.0001  |
| MF vs F        | 0.14        | 0.0269  | 0.59               | 0.0001  |
| MF vs G        | 0.26        | 0.0073  | 0.26               | 0.0010  |
| A vs B         | 0.82        | 0.0001  | 0.96               | 0.0001  |
| A vs C         | 0.24        | 0.0012  | 0.25               | 0.0003  |
| A vs D         | 0.69        | 0.0001  | 0.89               | 0.0001  |
| A vs E         | 0.55        | 0.0001  | 0.98               | 0.0001  |
| A vs F         | 0.74        | 0.0001  | 0.99               | 0.0001  |
| A vs G         | 0.55        | 0.0001  | 0.99               | 0.0001  |
| B vs C         | 0.85        | 0.0001  | 0.97               | 0.0001  |
| B vs D         | 0.50        | 0.0002  | 0.55               | 0.0001  |
| B vs E         | 0.44        | 0.0004  | 0.22               | 0.0001  |
| B vs F         | 0.28        | 0.0061  | 0.62               | 0.0001  |
| B vs G         | 0.62        | 0.0001  | 0.38               | 0.0001  |
| C vs D         | 0.83        | 0.0001  | 0.87               | 0.0001  |
| C vs E         | 0.63        | 0.0001  | 0.99               | 0.0001  |
| C vs F         | 0.81        | 0.0001  | 0.99               | 0.0001  |
| C vs G         | 0.66        | 0.0001  | 0.99               | 0.0001  |
| D vs E         | 0.30        | 0.0001  | 0.44               | 0.0001  |
| D vs F         | 0.12        | 0.0547  | 0.35               | 0.0001  |
| D vs G         | 0.40        | 0.0004  | 0.38               | 0.0001  |
| E vs F         | 0.24        | 0.0024  | 0.58               | 0.0001  |
| E vs G         | 0.04        | 0.1911  | 0.25               | 0.0009  |
| F vs G         | 0.41        | 0.0008  | 0.41               | 0.0002  |

**Supplementary Table 4. GO enrichment analysis of hepatic genes correlating with serum fatty acid levels in Cluster 1 and Cluster 2. Related to Supplementary Figure 6e.**

| Pathway                                                | GO      | FDR      | Fold Enrichment |
|--------------------------------------------------------|---------|----------|-----------------|
| <b>Cluster 1</b>                                       |         |          |                 |
| Lipid metabolic process                                | 6629    | 3.55E-31 | 5.97            |
| Small molecule metabolic process                       | 44281   | 2.67E-27 | 4.82            |
| Steroid metabolic process                              | 8202    | 1.15E-24 | 12.95           |
| Steroid biosynthetic process                           | 6694    | 1.63E-22 | 18.82           |
| Organic hydroxy compound biosynthetic process          | 1901617 | 1.63E-22 | 14.93           |
| Organic hydroxy compound metabolic process             | 1901615 | 2.97E-20 | 8.12            |
| Monocarboxylic acid metabolic process                  | 32787   | 2.95E-17 | 6.82            |
| Regulation of lipid metabolic process                  | 19216   | 3.60E-12 | 7.75            |
| Neutral lipid metabolic process                        | 6638    | 1.26E-10 | 12.48           |
| Unsaturated fatty acid metabolic process               | 33559   | 6.73E-10 | 12.52           |
| Thioester metabolic process                            | 35383   | 3.09E-08 | 13.92           |
| Regulation of small molecule metabolic process         | 62012   | 5.76E-08 | 6.21            |
| Ribose phosphate metabolic process                     | 19693   | 3.07E-07 | 5.56            |
| Sulfur compound metabolic process                      | 6790    | 7.31E-07 | 6.00            |
| Organic hydroxy compound transport                     | 15850   | 7.82E-07 | 6.46            |
| Regulation of cellular ketone metabolic process        | 10565   | 8.46E-07 | 9.99            |
| Lipid transport                                        | 6869    | 1.58E-06 | 5.25            |
| Nucleobase-containing small molecule metabolic process | 55086   | 1.58E-06 | 4.43            |
| Regulation of plasma lipoprotein particle levels       | 97006   | 2.78E-06 | 15.10           |
| Purine-containing compound metabolic process           | 72521   | 3.17E-06 | 4.98            |
| Regulation of transport                                | 51049   | 8.34E-06 | 2.46            |
| Cellular ketone metabolic process                      | 42180   | 1.06E-05 | 6.80            |
| Homeostatic process                                    | 42592   | 1.13E-05 | 2.46            |
| Carbohydrate derivative metabolic process              | 1901135 | 2.56E-05 | 3.06            |
| Response to nitrogen compound                          | 1901698 | 2.96E-05 | 2.80            |
| Cellular lipid catabolic process                       | 44242   | 7.02E-05 | 6.11            |
| Regulation of cholesterol esterification               | 10872   | 7.13E-05 | 39.65           |
| Response to nutrient levels                            | 31667   | 7.13E-05 | 3.86            |
| <b>Cluster 2</b>                                       |         |          |                 |
| Long-chain fatty acid metabolic process                | 1676    | 2.02E-16 | 29.00           |
| Lipid metabolic process                                | 6629    | 2.17E-16 | 5.78            |
| Monocarboxylic acid metabolic process                  | 32787   | 3.53E-15 | 8.88            |
| Small molecule metabolic process                       | 44281   | 1.31E-12 | 4.41            |
| Olefinic compound metabolic process                    | 120254  | 5.84E-07 | 13.11           |
| Icosanoid metabolic process                            | 6690    | 1.57E-06 | 14.00           |
| Thioester metabolic process                            | 35383   | 1.57E-06 | 17.74           |
| Xenobiotic metabolic process                           | 6805    | 2.83E-06 | 16.35           |
| Response to xenobiotic stimulus                        | 9410    | 9.14E-06 | 13.90           |

**Supplementary Table 5. Cytokines in serum from *vena cava* mice transplanted with caecum microbiota from mice fed MF or A diet and subsequently fed MF diet for 9 weeks.** n = 15 (MF microbiota), 14 = (A microbiota). Data are presented as mean  $\pm$  S.E.M. Source data are provided as a Source Data file.

|                                | <b>MF microbiota</b> | <b>A microbiota</b> |
|--------------------------------|----------------------|---------------------|
| <b>IFN-<math>\gamma</math></b> | 0,49 $\pm$ 0,19      | 0,46 $\pm$ 0,23     |
| <b>IL-10</b>                   | 8,0 $\pm$ 3,3        | 4,5 $\pm$ 0,49      |
| <b>IL-12p70</b>                | 5,9 $\pm$ 2,9        | 5,3 $\pm$ 2,4       |
| <b>IL-13</b>                   | 0,49 $\pm$ 0,38      | 0,078 $\pm$ 0,075   |
| <b>IL-1<math>\beta</math></b>  | ND                   | ND                  |
| <b>IL-2</b>                    | 0,32 $\pm$ 0,068     | 0,59 $\pm$ 0,081    |
| <b>IL-4</b>                    | 0,084 $\pm$ 0,061    | 0,062 $\pm$ 0,036   |
| <b>IL-5</b>                    | 1,9 $\pm$ 0,26       | 1,8 $\pm$ 0,23      |
| <b>KC/GRO</b>                  | 73 $\pm$ 7,9         | 65 $\pm$ 9,1        |
| <b>TNF-<math>\alpha</math></b> | 7,0 $\pm$ 0,67       | 8,2 $\pm$ 1,7       |
