# Supplementary material for: The interplay between dietary fatty acids and gut microbiota influences host metabolism and hepatic steatosis
Source: PubMed Central journal article supplement (PMC10474162; doi:10.1038/s41467-023-41074-3), 2023-09-01
Supplement: 41467_2023_41074_MOESM3_ESM.pdf [file 41467_2023_41074_MOESM3_ESM.pdf]

## Supplementary Data Legends

File name: Supplementary Data 1

Description: Correlation coefficients between cecal fatty acids and bacterial OTUs derived from rCCA analysis. Significant correlations are highlighted in grey ( $R > 0.265$ ,  $p < 0.05$  for  $n = 56$ ). Related to Figure 5a,b and Extended Data Figure 6a.

File name: Supplementary Data 2.

Description: Positive and negative significant interactions in network analysis between cecum fatty acids, caeum bacteria and host metabolic features. Related to Figure 5c.
